# Supplementary material for: Development and Evaluation of an Immunoglobulin Y-Based ELISA for Measuring Prostate Specific Antigen in Human Serum
Source: PubMed Central journal article supplement — Ann Lab Med. 2019 Feb 26;39(4):373–80. doi: 10.3343/alm.2019.39.4.373 (PMC6400723; doi:10.3343/alm.2019.39.4.373), 2019-02-26
Supplement: alm-39-373-s001.pdf [file alm-39-373-s001.pdf]

## SUPPLEMENTAL MATERIALS

### Optimization of the IgY-Based ELISA

Optimization of the IgY-based ELISA for PSA detection was performed for different concentrations of PSA-specific mouse monoclonal IgG and avian polyclonal IgY antibodies (Supplemental Data Fig. S1). The microtiter plate was coated with an anti-PSA mouse monoclonal IgG antibody, blocked, and incubated with fPSA at different concentrations (5.000, 0.500, and 0.050 ng/mL). For the detection of an antigen, affinity purified anti-PSA IgY antibodies were used at different concentrations (1.000, 2.500, 5.000, and 7.500  $\mu\text{g/mL}$ ). The results are presented as  $\text{EI} \pm \text{SEM}$  values. As optimal conditions, we assumed both antibody concentrations were 2.500  $\mu\text{g/mL}$  because of the highest ELISA Index (where  $\text{EI} = \text{OD}_{\text{sample}} / \text{OD}_{\text{control}}$ ). Values of  $> 1.200$  were considered positive [36] for 50.000  $\mu\text{g/mL}$  of PSA protein, which was determined as the detection limit, as previously shown [16].

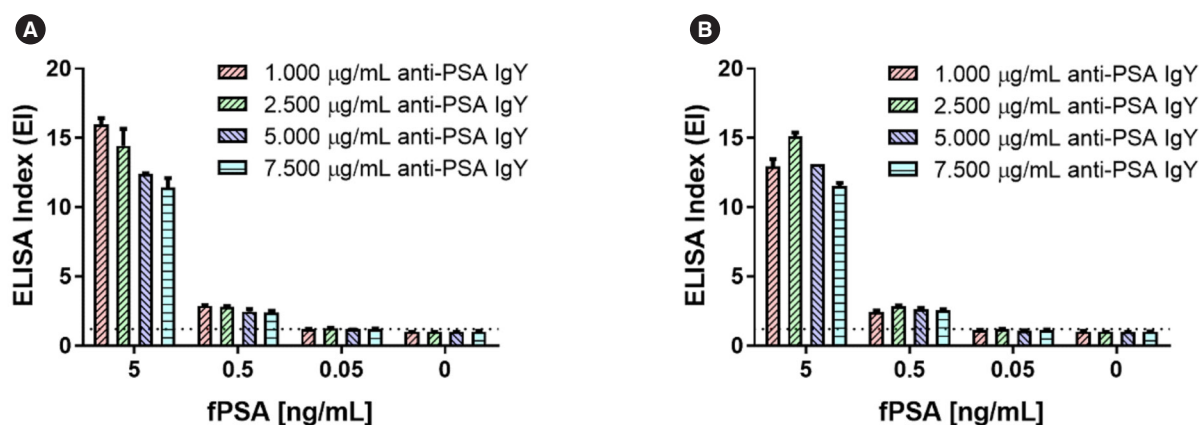

**Supplemental Data Fig. S1.** Optimization of IgY-based sandwich ELISA for two different concentrations of IgY antibodies (A. 2.500  $\mu\text{g/mL}$ , B. 5.000  $\mu\text{g/mL}$ ).

Abbreviation: fPSA, free prostate specific antigen.
